# Supplementary material
Source: PubMed Central journal article supplement (PMC5005877)
Supplement: 11357_2015_9870_MOESM1_ESM.pdf [file 11357_2015_9870_MOESM1_ESM.pdf]

## Supporting Information 1, Table 1

Supporting Information 1, Table 1. Data collecting years, subject description, number of subjects and methodology used to determinate changes in muscle mass in each cluster.

| Study cluster | Sampling years | Study groups                                     | Training groups: |            |            | Control groups: |           |           | Method of muscle mass measurement                                             |
|---------------|----------------|--------------------------------------------------|------------------|------------|------------|-----------------|-----------|-----------|-------------------------------------------------------------------------------|
|               |                |                                                  | Men              | Women      | Total      | Men             | Women     | Total     |                                                                               |
| 1             | 1996           | Middle-aged and older men and women              | 21               | 21         | 42         |                 |           |           | US: CSA of QF                                                                 |
| 2             | 1998-2004      | Middle-aged and older men and women              | 50               | 54         | 104        | 16              |           | 16        | MRI: CSA of QF                                                                |
| 3             | 2005-2007      | Middle-aged and older men and women, Younger men | 63               | 29         | 92         | 16              | 19        | 35        | MRI: CSA of QF (n=22); US: thickness of VL (n=27); DXA: LM of the legs (n=78) |
| 4             | 2010-2011      | Younger and older men                            | 49               |            | 49         | 21              |           | 21        | DXA: LM of the legs                                                           |
| <b>Total:</b> |                |                                                  | <b>183</b>       | <b>104</b> | <b>287</b> | <b>53</b>       | <b>19</b> | <b>72</b> |                                                                               |

US, ultrasound; CSA, cross-sectional area; QF, m.quadriceps femoris; MRI, magnetic resonance imaging; VL, m.vastus lateralis; DXA, Dual-energy X-ray Absorptiometry; LM, lean mass

**References** (see Supporting Information 3, References).

### Study cluster 1:

Häkkinen et al. 1998

### Study cluster 2:

Ahtiainen et al. 2003; Häkkinen et al. 2001 and 2003; Mikkola et al. 2012; Sallinen et al. 2006 and 2007b;

### Study cluster 3:

Ahtiainen et al. 2009 and 2010; Hulmi et al. 2007, 2009a and 2009b; Sillanpää et al. 2008, 2009, 2010 and 2013

### Study cluster 4:

Walker et al. 2013 and 2014
