# Supplementary material
Source: PubMed Central journal article supplement (PMC5005877)
Supplement: 11357_2015_9870_MOESM3_ESM.pdf [file 11357_2015_9870_MOESM3_ESM.pdf]

## Supporting Information 3, References

Ahtiainen J.P., Hoffren M., Hulmi J.J., Pietikäinen M., Mero A.A., Avela J., and Häkkinen K. Panoramic Ultrasonography is a Valid Method to Measure Changes in Skeletal Muscle Cross-Sectional Area. *Eur J Appl Physiol* 2010; 108: 273-279.

Ahtiainen J.P., Hulmi J.J., Kraemer W.J., Lehti M., Nyman K., Selänne H., Alen M., Pakarinen A., Komulainen J., Kovanen V., Mero A.A., and Häkkinen K. Heavy Resistance Exercise Training and Skeletal Muscle Androgen Receptor Expression in Younger and Older Men. *Steroids* 2011; 76: 183-192.

Ahtiainen J.P., Hulmi J.J., Kraemer W.J., Lehti M., Pakarinen A., Mero A.A., Karavirta L., Sillanpää E., Selänne H., Alen M., Komulainen J., Kovanen V., Nyman K., and Häkkinen K. Strength, [Corrected] Endurance Or Combined Training Elicit Diverse Skeletal Muscle Myosin Heavy Chain Isoform Proportion but Unaltered Androgen Receptor Concentration in Older Men. *Int J Sports Med* 2009; 30: 879-887.

Ahtiainen J.P., Pakarinen A., Alen M., Kraemer W.J., and Häkkinen K. Muscle Hypertrophy, Hormonal Adaptations and Strength Development during Strength Training in Strength-Trained and Untrained Men. *Eur J Appl Physiol* 2003; 89: 555-563.

Garcia-Lopez D., Häkkinen K., Cuevas M.J., Lima E., Kauhanen A., Mattila M., Sillanpää E., Ahtiainen J.P., Karavirta L., Almar M., and Gonzalez-Gallego J. Effects of Strength and Endurance Training on Antioxidant Enzyme Gene Expression and Activity in Middle-Aged Men. *Scand J Med Sci Sports* 2007; 17: 595-604.

Häkkinen K., Alen M., Kallinen M., Newton R.U., and Kraemer W.J. Neuromuscular Adaptation during Prolonged Strength Training, Detraining and Re-Strength-Training in Middle-Aged and Elderly People. *Eur J Appl Physiol* 2000; 83: 51-62.

Häkkinen K., Alen M., Kraemer W.J., Gorostiaga E., Izquierdo M., Rusko H., Mikkola J., Häkkinen A., Valkeinen H., Kaarakainen E., Romu S., Erola V., Ahtiainen J., and Paavolainen L. Neuromuscular Adaptations during Concurrent Strength and Endurance Training Versus Strength Training. *Eur J Appl Physiol* 2003; 89: 42-52.

Häkkinen K., Kallinen M., Izquierdo M., Jokelainen K., Lassila H., Mälkiä E., Kraemer W.J., Newton R.U., and Alen M. Changes in Agonist-Antagonist EMG, Muscle CSA, and Force during Strength Training in Middle-Aged and Older People. *J Appl Physiol* (1985) 1998; 84: 1341-1349.

Häkkinen K., Pakarinen A., Kraemer W.J., Häkkinen A., Valkeinen H., and Alen M. Selective Muscle Hypertrophy, Changes in EMG and Force, and Serum Hormones during Strength Training in Older Women. *J Appl Physiol* (1985) 2001; 91: 569-580.

Holviala J., Häkkinen A., Karavirta L., Nyman K., Izquierdo M., Gorostiaga E.M., Avela J., Korhonen J., Knuutila V.P., Kraemer W.J., and Häkkinen K. Effects of Combined Strength and Endurance Training on Treadmill Load Carrying Walking Performance in Aging Men. *J Strength Cond Res* 2010; 24: 1584-1595.

Holviala J., Kraemer W.J., Sillanpää E., Karppinen H., Avela J., Kauhanen A., Häkkinen A., and Häkkinen K. Effects of Strength, Endurance and Combined Training on Muscle Strength, Walking Speed and Dynamic Balance in Aging Men. *Eur J Appl Physiol* 2012; 112: 1335-1347.

Holviala J.H., Sallinen J.M., Kraemer W.J., Alen M.J., and Häkkinen K.K. Effects of Strength Training on Muscle Strength Characteristics, Functional Capabilities, and Balance in Middle-Aged and Older Women. *J Strength Cond Res* 2006; 20: 336-344.

Hulmi J.J., Ahtiainen J.P., Kaasalainen T., Pöllänen E., Häkkinen K., Alen M., Selänne H., Kovanen V., and Mero A.A. Postexercise Myostatin and Activin IIB mRNA Levels: Effects of Strength Training. *Med Sci Sports Exerc* 2007; 39: 289-297.

Hulmi J.J., Kovanen V., Selänne H., Kraemer W.J., Häkkinen K., and Mero A.A. Acute and Long-Term Effects of Resistance Exercise with Or without Protein Ingestion on Muscle Hypertrophy and Gene Expression. *Amino Acids* 2009a; 37: 297-308.

Hulmi J.J., Tannerstedt J., Selänne H., Kainulainen H., Kovanen V., and Mero A.A. Resistance Exercise with Whey Protein Ingestion Affects mTOR Signaling Pathway and Myostatin in Men. *J Appl Physiol (1985)* 2009b; 106: 1720-1729.

Karavirta L., Häkkinen A., Sillanpää E., Garcia-Lopez D., Kauhanen A., Haapasaari A., Alen M., Pakarinen A., Kraemer W.J., Izquierdo M., Gorostiaga E., and Häkkinen K. Effects of Combined Endurance and Strength Training on Muscle Strength, Power and Hypertrophy in 40-67-Year-Old Men. *Scand J Med Sci Sports* 2011; 21: 402-411.

Karavirta L., Tulppo M.P., Laaksonen D.E., Nyman K., Laukkanen R.T., Kinnunen H., Häkkinen A., and Häkkinen K. Heart Rate Dynamics After Combined Endurance and Strength Training in Older Men. *Med Sci Sports Exerc* 2009; 41: 1436-1443.

Mero A.A., Hulmi J.J., Salmijärvi H., Katajavuori M., Haverinen M., Holviala J., Ridanpää T., Häkkinen K., Kovanen V., Ahtiainen J.P., and Selänne H. Resistance Training Induced

Increase in Muscle Fiber Size in Young and Older Men. *Eur J Appl Physiol* 2013; 113: 641-650.

Mikkola J., Rusko H., Izquierdo M., Gorostiaga E.M., and Häkkinen K. Neuromuscular and Cardiovascular Adaptations during Concurrent Strength and Endurance Training in Untrained Men. *Int J Sports Med* 2012; 33: 702-710.

Sallinen J., Fogelholm M., Pakarinen A., Juvonen T., Volek J.S., Kraemer W.J., Alen M., and Häkkinen K. Effects of Strength Training and Nutritional Counseling on Metabolic Health Indicators in Aging Women. *Can J Appl Physiol* 2005; 30: 690-707.

Sallinen J., Fogelholm M., Volek J.S., Kraemer W.J., Alen M., and Häkkinen K. Effects of Strength Training and Reduced Training on Functional Performance and Metabolic Health Indicators in Middle-Aged Men. *Int J Sports Med* 2007a; 28: 815-822.

Sallinen J., Pakarinen A., Fogelholm M., Alen M., Volek J.S., Kraemer W.J., and Häkkinen K. Dietary Intake, Serum Hormones, Muscle Mass and Strength during Strength Training in 49 - 73-Year-Old Men. *Int J Sports Med* 2007b; 28: 1070-1076.

Sallinen J., Pakarinen A., Fogelholm M., Sillanpää E., Alen M., Volek J.S., Kraemer W.J., and Häkkinen K. Serum Basal Hormone Concentrations and Muscle Mass in Aging Women: Effects of Strength Training and Diet. *Int J Sport Nutr Exerc Metab* 2006; 16: 316-331.

Sillanpää E., Häkkinen A., and Häkkinen K. Body Composition Changes by DXA, BIA and Skinfolds during Exercise Training in Women. *Eur J Appl Physiol* 2013; 113: 2331-2341.

Sillanpää E., Häkkinen A., Laaksonen D.E., Karavirta L., Kraemer W.J., and Häkkinen K. Serum Basal Hormone Concentrations, Nutrition and Physical Fitness during Strength and/Or Endurance Training in 39-64-Year-Old Women. *Int J Sports Med* 2010; 31: 110-117.

Sillanpää E., Häkkinen A., Nyman K., Mattila M., Cheng S., Karavirta L., Laaksonen D.E., Huuhka N., Kraemer W.J., and Häkkinen K. Body Composition and Fitness during Strength and/Or Endurance Training in Older Men. *Med Sci Sports Exerc* 2008; 40: 950-958.

Sillanpää E., Häkkinen K., Holviala J., and Häkkinen A. Combined Strength and Endurance Training Improves Health-Related Quality of Life in Healthy Middle-Aged and Older Adults. *Int J Sports Med* 2012; 33: 981-986.

Sillanpää E., Laaksonen D.E., Häkkinen A., Karavirta L., Jensen B., Kraemer W.J., Nyman K., and Häkkinen K. Body Composition, Fitness, and Metabolic Health during Strength and Endurance Training and their Combination in Middle-Aged and Older Women. *Eur J Appl Physiol* 2009; 106: 285-296.

Walker S., Hulmi J.J., Wernbom M., Nyman K., Kraemer W.J., Ahtiainen J.P., and Häkkinen K. Variable Resistance Training Promotes Greater Fatigue Resistance but Not Hypertrophy Versus Constant Resistance Training. *Eur J Appl Physiol* 2013; 113: 2233-2244.

Walker S., Peltonen H., Sautel J., Scaramella C., Kraemer W.J., Avela J., and Häkkinen K. Neuromuscular Adaptations to Constant Vs. Variable Resistance Training in Older Men. *Int J Sports Med* 2014; 35: 69-74.
